# Supplementary material
Source: publisher site journal article supplement (https://www.dovepress.com/article/497418)
Supplement: Supplementary file 1 [file get_supplementary_file.php]

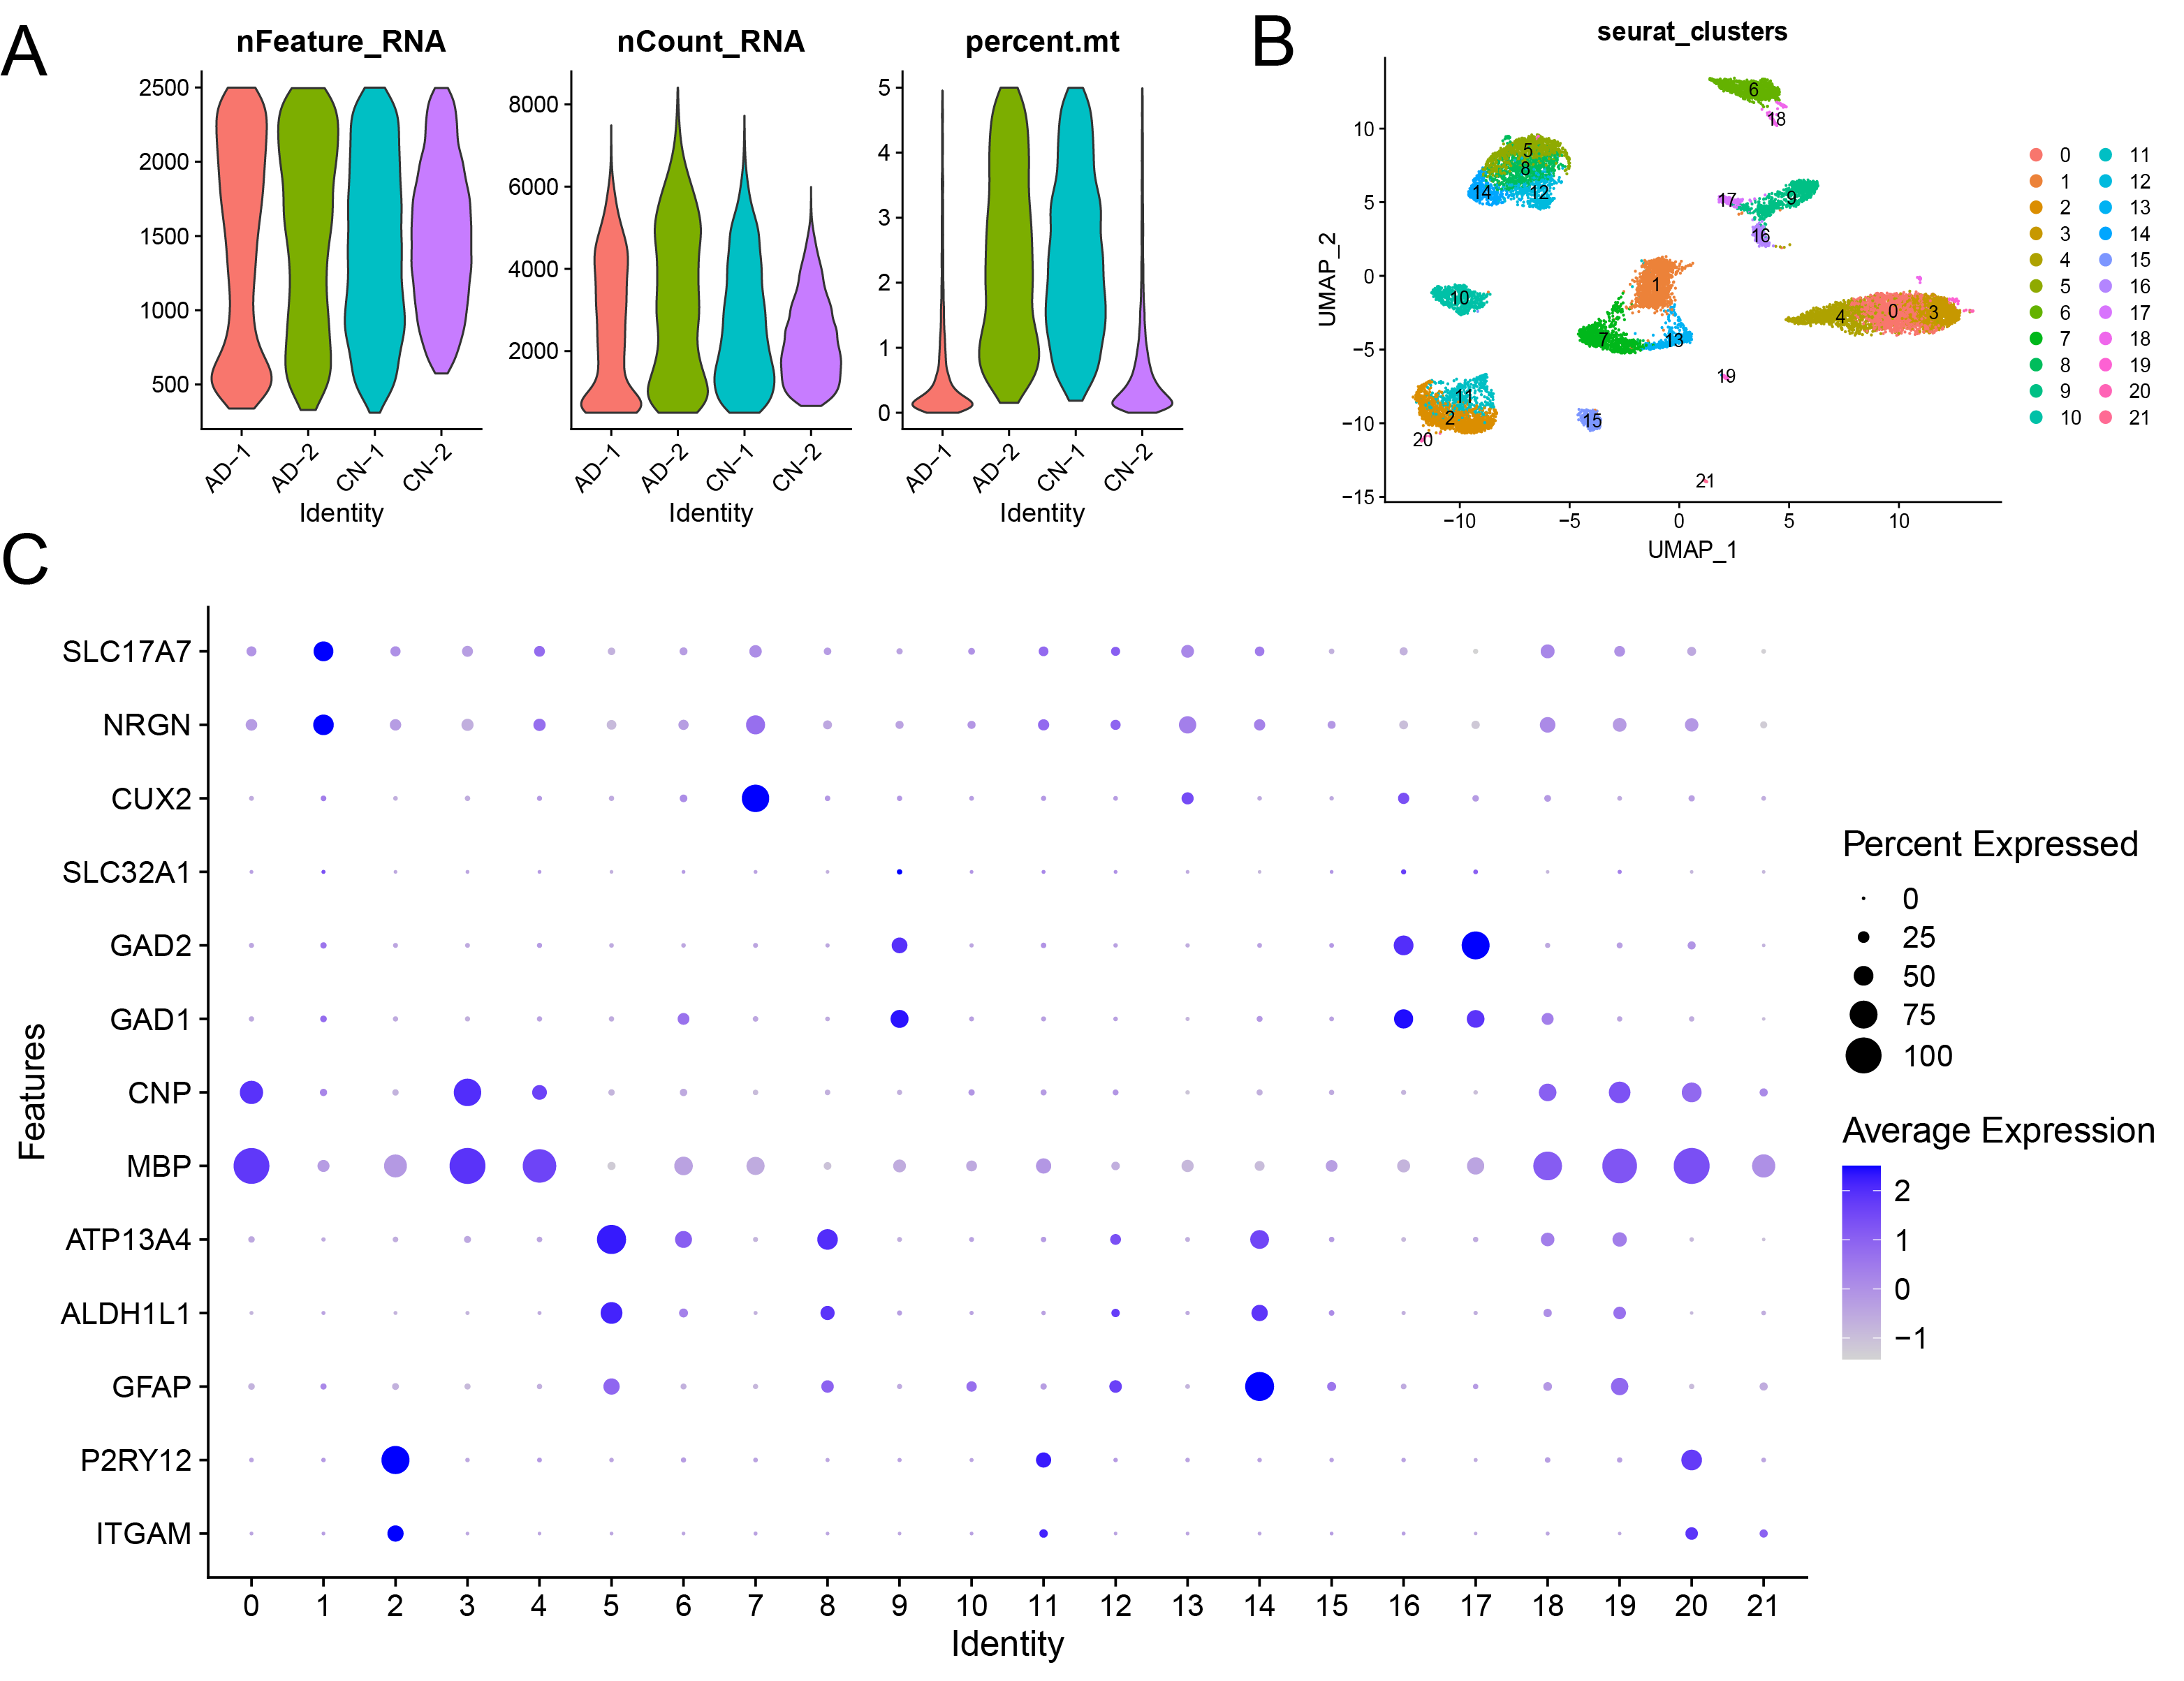
**F****igure S1. Cell clustering of hippocampus scRNA-seq data. (A)** Cell characteristics before quality control. **(B)** The cells were divided into 22 clusters. **(C)** Feature genes expression in 22 cell clusters.

**
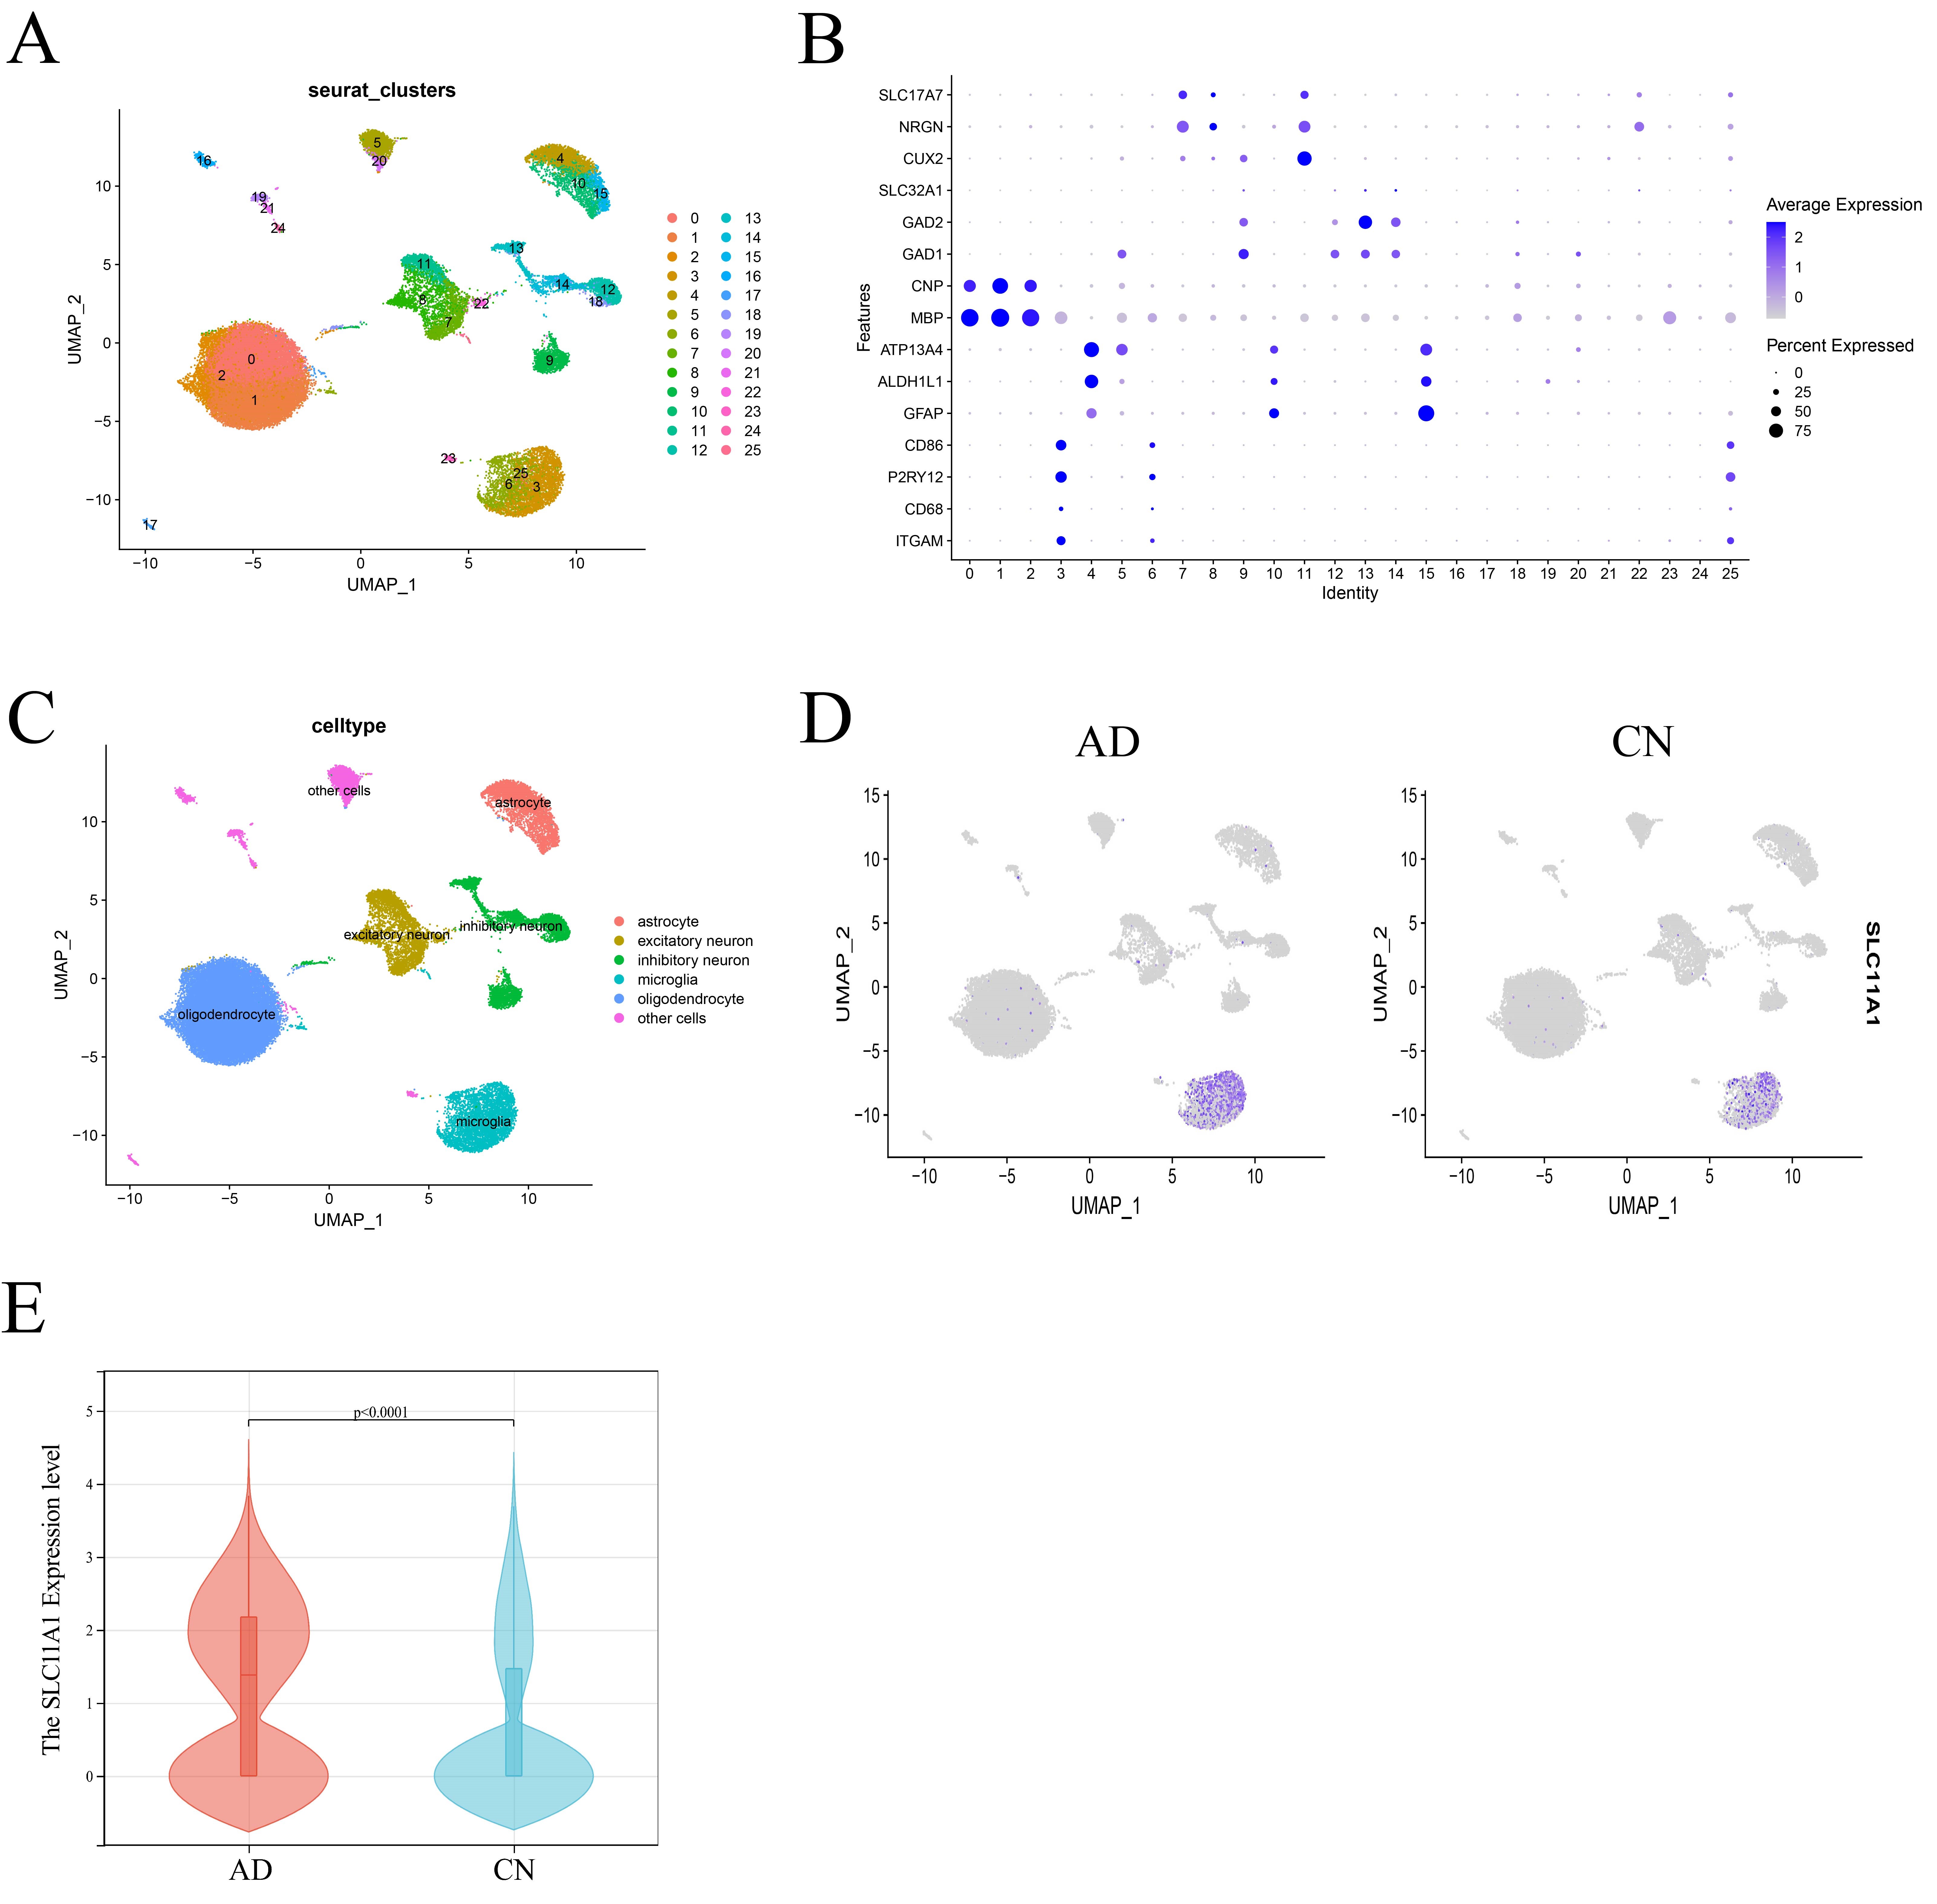
Figure S2. scRNA-seq data analysis of middle temporal gyrus. (A)** The cells were divided into 26 clusters. **(B)** Feature genes expression in 26 cell clusters. **(C)** Cells were manually annotated with reference to CellMarker. **(D)** Expression distribution of SLC11A1 in different cells. **(E)** Differences in SLC11A1 expression between AD and CN groups in microglia, significance was tested using the Wilcoxon test.

AD, Alzheimer's disease; CN, control normal.


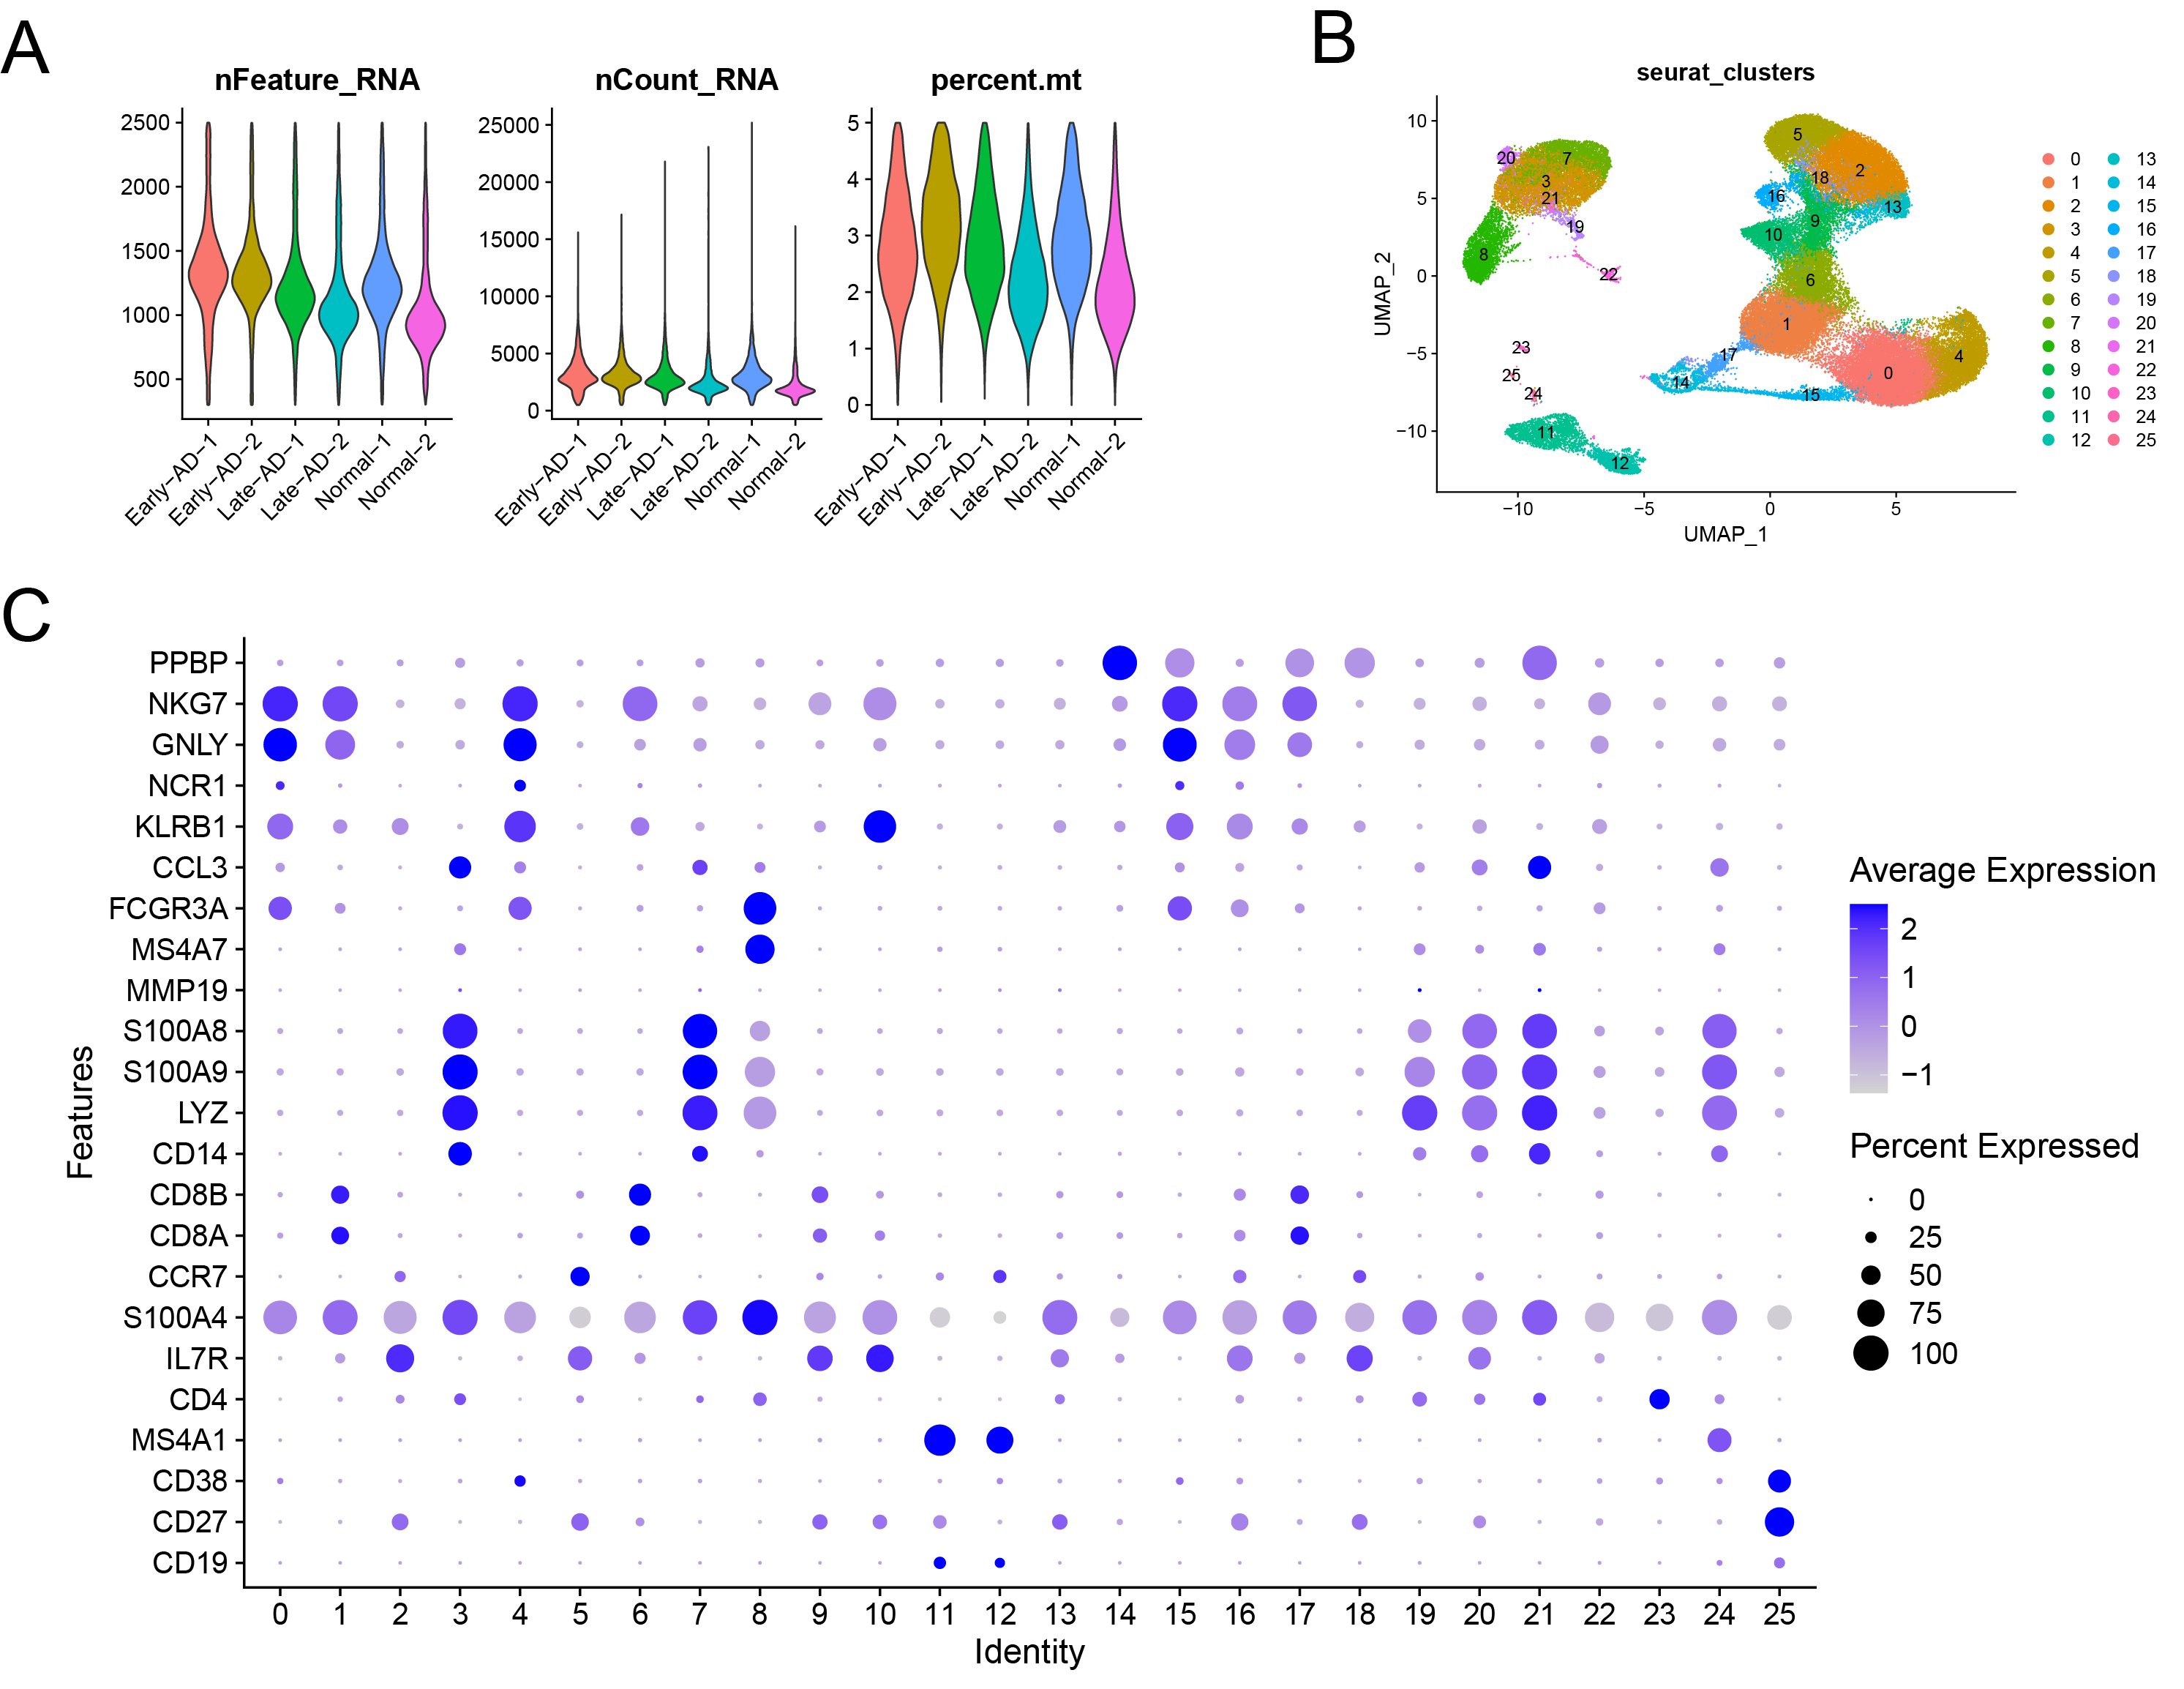
**Figure S3.** **Cell clustering of peripheral blood scRNA-seq data. (A)** Cell characteristics before quality control. **(B)** The cells were divided into 26 clusters. **(C)** Feature genes expression in 26 cell clusters.

**
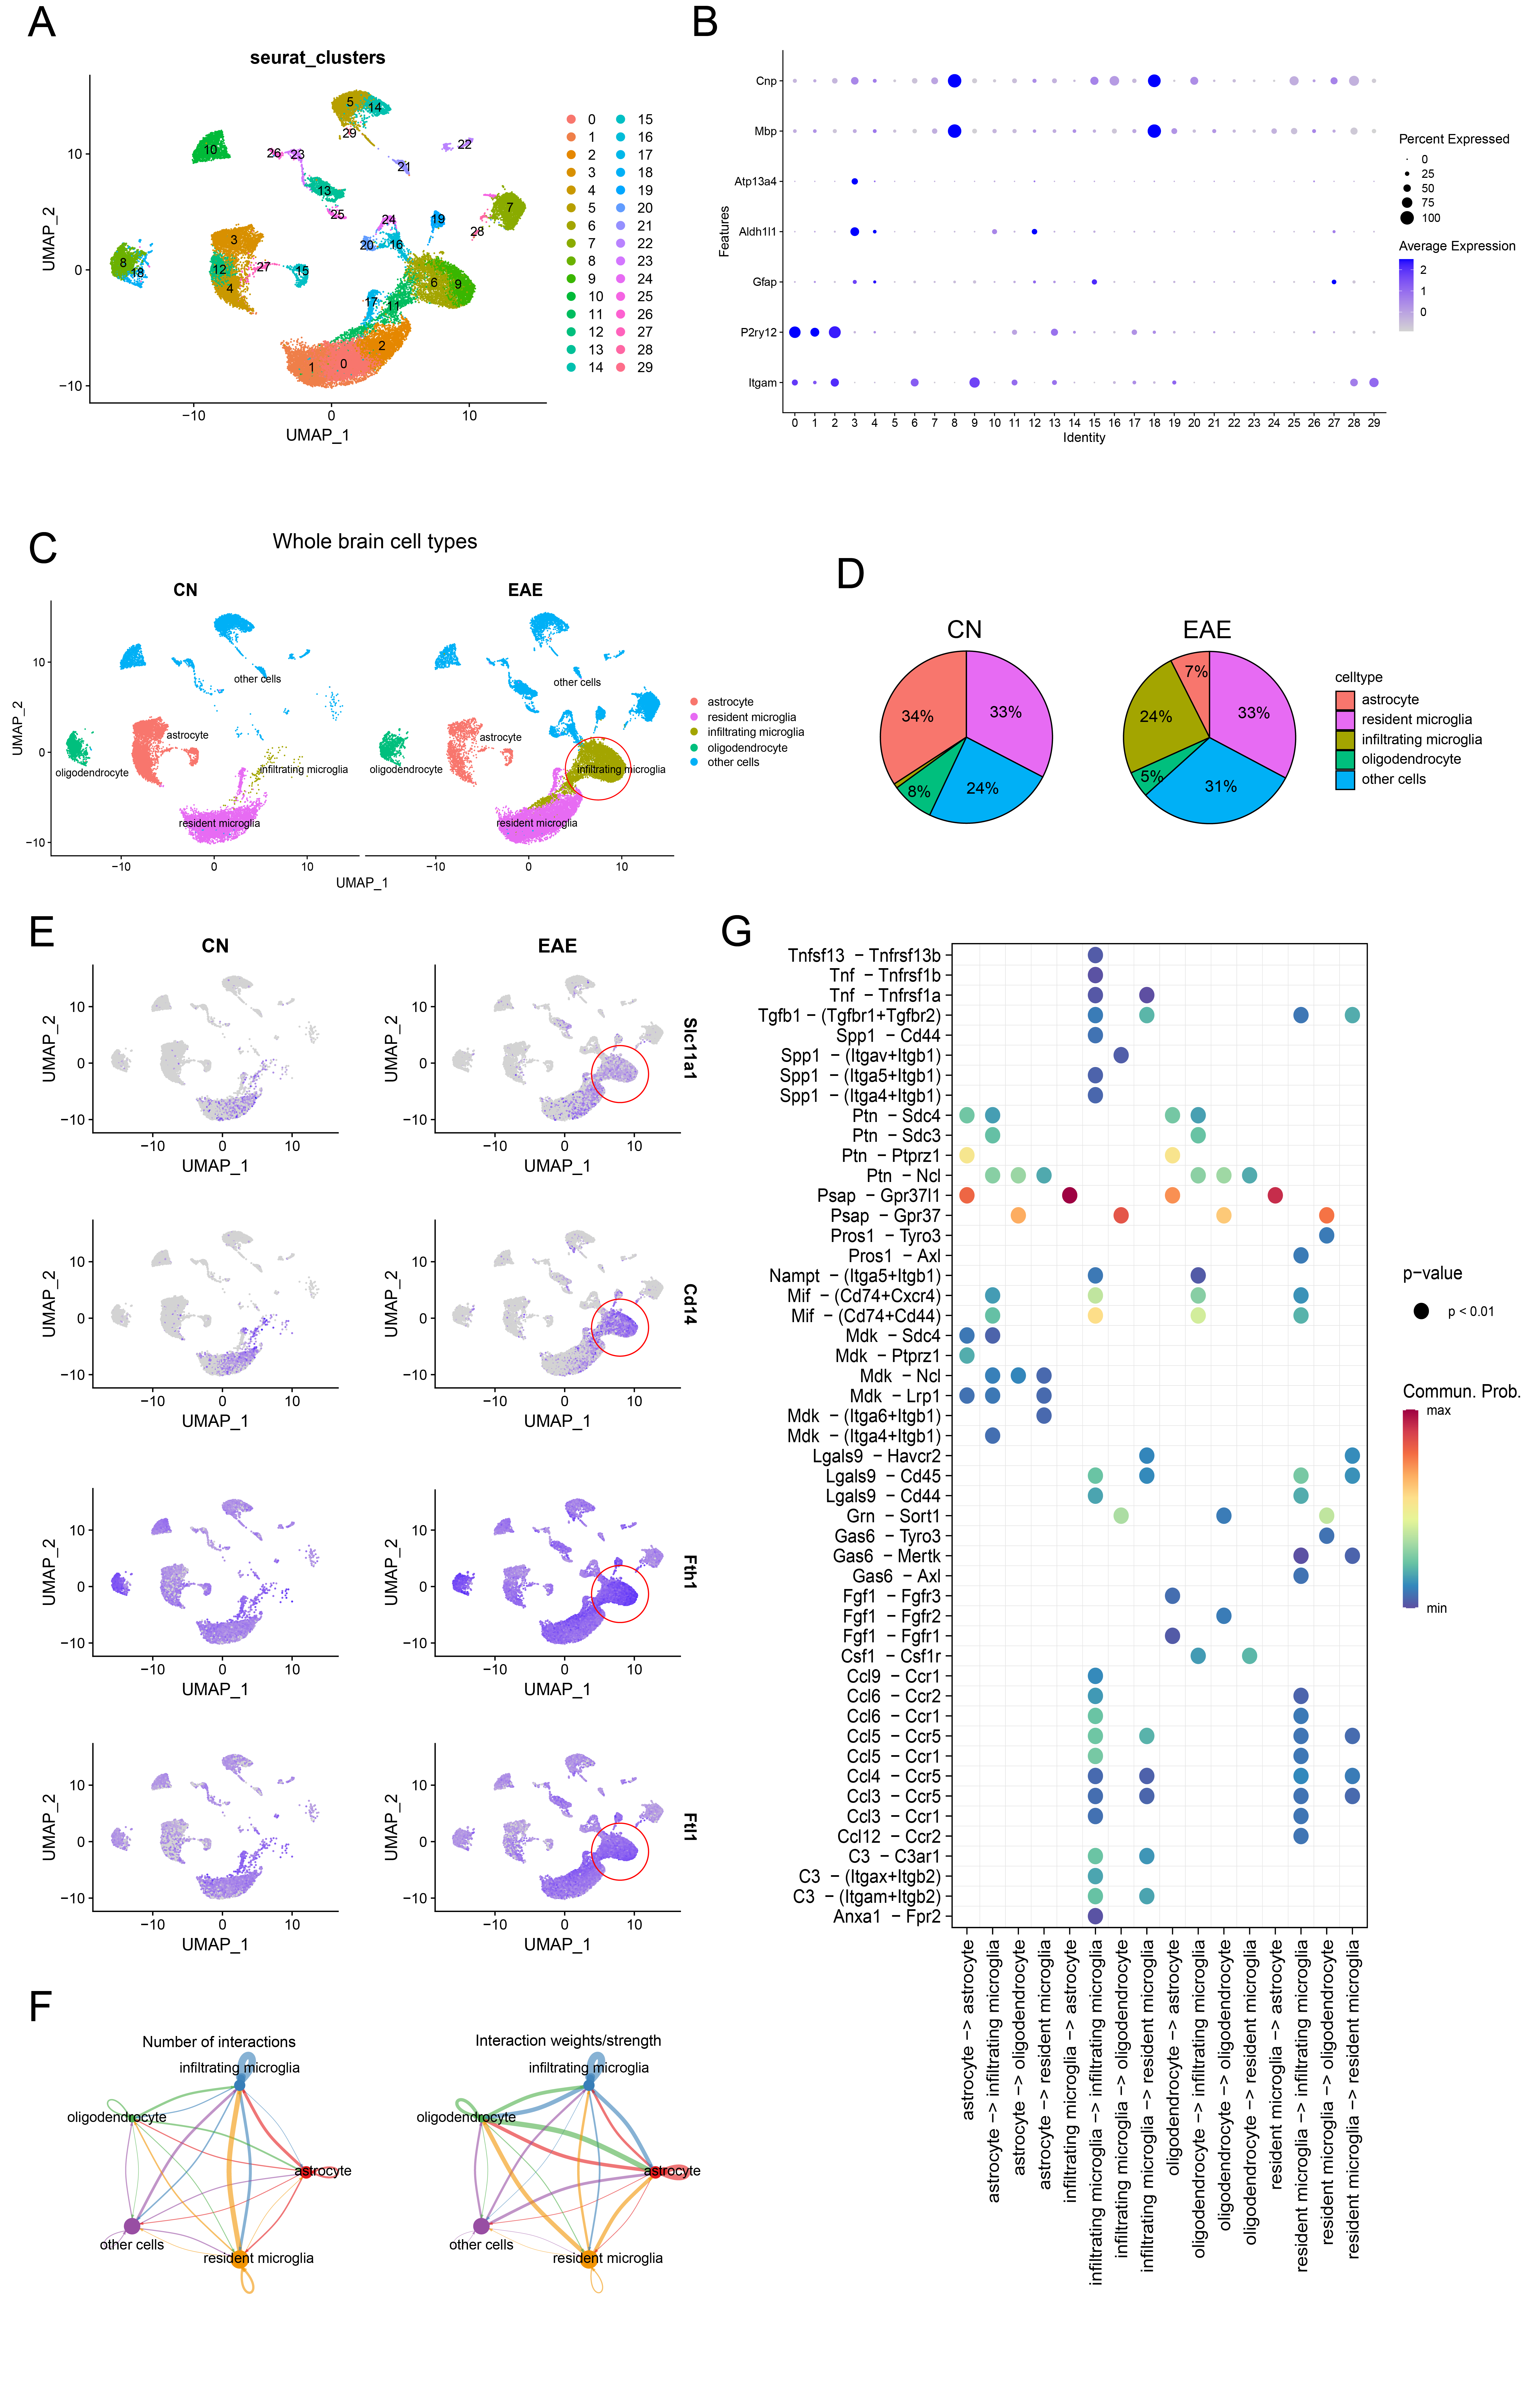
**

**Figure S4. scRNA-seq data analysis of EAE mouse brain. (A)** The cells were divided into 30 clusters. **(B)** Feature genes expression in 30 cell clusters. **(C)** Distribution of brain cell clusters in CN and EAE mice. **(D)** Proportion of cells in EAE and CN groups. **(E)** Expression distribution of SLC11A1 and CCL5 in brain different cells. **(F)** The count and strength of intercellular communication. **(G)** Visualization of receptor-ligand related pathways among resident microglia, infiltrating microglia, astrocytes, and oligodendrocytes.
